# Supplementary material
Source: bioRxiv or medRxiv preprint supplement (https://medrxiv.org/highwire/filestream/69179/field_highwire_adjunct_files/0/19007286-1.pdf)
Supplement: Supplementary file [file 19007286-1.pdf]

**Supplementary Table 1.** Numeric results from Figure 3: Entity-level precision, recall, and F1 performance measures for medExtractR

| <b>Training Set Performance</b> |                   |                   |                   |                   |                   |                   |                   |                   |                 |
|---------------------------------|-------------------|-------------------|-------------------|-------------------|-------------------|-------------------|-------------------|-------------------|-----------------|
|                                 | Tacrolimus        |                   |                   | Lamotrigine       |                   |                   |                   |                   |                 |
|                                 | Precision         | Recall            | F1                | Precision         | Recall            | F1                |                   |                   |                 |
| <b>DrugName</b>                 | .99 [.97, 1.00]   | 1.00 [1.00, 1.00] | 1.00 [.99, 1.00]  | 1.00 [1.00, 1.00] | .99 [.96, 1.00]   | .99 [.98, 1.00]   |                   |                   |                 |
| <b>Strength</b>                 | .98 [.93, 1.00]   | 1.00 [1.00, 1.00] | .99 [.96, 1.00]   | .96 [.88, 1.00]   | 1.00 [1.00, 1.00] | .98 [.94, 1.00]   |                   |                   |                 |
| <b>DoseAmount</b>               | .95 [.87, .99]    | 1.00 [1.00, 1.00] | .98 [.93, 1.00]   | 1.00 [1.00, 1.00] | 1.00 [1.00, 1.00] | 1.00 [1.00, 1.00] |                   |                   |                 |
| <b>Dose</b>                     | 1.00 [1.00, 1.00] | .98 [.95, 1.00]   | .99 [.98, 1.00]   | 1.00 [1.00, 1.00] | .94 [.88, 1.00]   | .97 [.94, 1.00]   |                   |                   |                 |
| <b>Frequency</b>                | 1.00 [1.00, 1.00] | 1.00 [1.00, 1.00] | 1.00 [1.00, 1.00] | .98 [.92, 1.00]   | .95 [.88, 1.00]   | .96 [.90, 1.00]   |                   |                   |                 |
| <b>IntakeTime</b>               | 1.00 [1.00, 1.00] | 1.00 [1.00, 1.00] | 1.00 [1.00, 1.00] | 1.00 [1.00, 1.00] | .94 [.81, 1.00]   | .97 [.89, 1.00]   |                   |                   |                 |
| <b>DoseChange</b>               | 1.00 [1.00, 1.00] | 1.00 [1.00, 1.00] | 1.00 [1.00, 1.00] | 1.00 [1.00, 1.00] | 1.00 [1.00, 1.00] | 1.00 [1.00, 1.00] |                   |                   |                 |
| <b>Test Set Performance</b>     |                   |                   |                   |                   |                   |                   |                   |                   |                 |
|                                 | Tacrolimus        |                   |                   | Lamotrigine       |                   |                   | Allopurinol       |                   |                 |
|                                 | Precision         | Recall            | F1                | Precision         | Recall            | F1                | Precision         | Recall            | F1              |
| <b>DrugName</b>                 | .96 [.92, 1.00]   | 1.00 [1.00, 1.00] | .98 [.96, 1.00]   | 1.00 [1.00, 1.00] | .99 [.96, 1.00]   | .99 [.98, 1.00]   | .99 [.97, 1.00]   | .99 [.97, 1.00]   | .99 [.97, 1.00] |
| <b>Strength</b>                 | .97 [.92, 1.00]   | 1.00 [1.00, 1.00] | .99 [.96, 1.00]   | .91 [.79, 1.00]   | .94 [.85, 1.00]   | .92 [.85, .98]    | .99 [.96, 1.00]   | 1.00 [1.00, 1.00] | .99 [.98, 1.00] |
| <b>DoseAmount</b>               | .97 [.92, 1.00]   | 1.00 [1.00, 1.00] | .99 [.96, 1.00]   | .93 [.83, 1.00]   | 1.00 [1.00, 1.00] | .96 [.91, 1.00]   | .95 [.89, 1.00]   | 1.00 [1.00, 1.00] | .98 [.94, 1.00] |
| <b>Dose</b>                     | .97 [.90, 1.00]   | 1.00 [1.00, 1.00] | .98 [.95, 1.00]   | .91 [.81, 1.00]   | .90 [.81, .98]    | .91 [.83, .97]    | 1.00 [1.00, 1.00] | .93 [.78, 1.00]   | .96 [.88, 1.00] |
| <b>Frequency</b>                | .98 [.96, 1.00]   | .98 [.95, 1.00]   | .98 [.96, 1.00]   | .98 [.92, 1.00]   | .98 [.93, 1.00]   | .98 [.94, 1.00]   | .96 [.91, 1.00]   | .98 [.94, 1.00]   | .97 [.94, 1.00] |
| <b>IntakeTime</b>               | N/A               | N/A               | N/A               | .94 [.81, 1.00]   | .86 [.71, .97]    | .90 [.79, .97]    | .89 [.40, 1.00]   | .89 [.40, 1.00]   | .89 [.50, 1.00] |
| <b>DoseChange</b>               | 1.00 [1.00, 1.00] | .50 [0.00, 1.00]  | .67 [.40, 1.00]   | 1.00 [1.00, 1.00] | .78 [.45, 1.00]   | .88 [.67, 1.00]   | 1.00 [1.00, 1.00] | .83 [.67, 1.00]   | .91 [.80, 1.00] |

F1 represents F-measure. The training sets consisted of 60 notes each for tacrolimus and lamotrigine. The test sets consisted of 50 notes each for tacrolimus and lamotrigine, and 110 notes for allopurinol. Note that there were no annotations or extractions of intake time for tacrolimus in the test set of clinical notes. The number of dose change extractions were 3 and 10 for the tacrolimus and lamotrigine training sets, respectively, and 2, 9, and 6 for the tacrolimus, lamotrigine, and allopurinol test sets, respectively. The number of extractions in the training or test set for each drug and for all other entities is presented in Figure 3.
